# Supplementary material for: Molten salt synthesis of nitrogen doped carbon nanoparticles for enhanced type-I photodynamic therapy
Source: Royal Society of Chemistry journal article supplement (doi:10.1039/d1nj02608a), 2021-01-01
Supplement: d1nj02608a1.pdf [file d1nj02608a1.pdf]

Electronic Supplementary Material (ESI) for New Journal of Chemistry.  
This journal is © The Royal Society of Chemistry and the Centre National de la Recherche Scientifique 2021

## Supporting information

### Molten Salt Synthesis of Nitrogen Doped Carbon Nanoparticles for Enhanced Type-I Photodynamic Therapy

Yanan Tian,<sup>ab</sup> Yuxin Huang,<sup>b</sup> Xiaoyu Huang,<sup>b</sup> Zhi Su<sup>\*a</sup> and Fu Wang<sup>\*b</sup>

a. College of Chemistry and Chemical Engineering, Xinjiang Normal University, Xinjiang 830054, Urumqi, China.

E-mail: suzhixj@sina.com

b. School of Biomedical Engineering Shanghai Jiao Tong University, Shanghai 200240, China.

E-mail: wangfu@ms.xjb.ac.cn

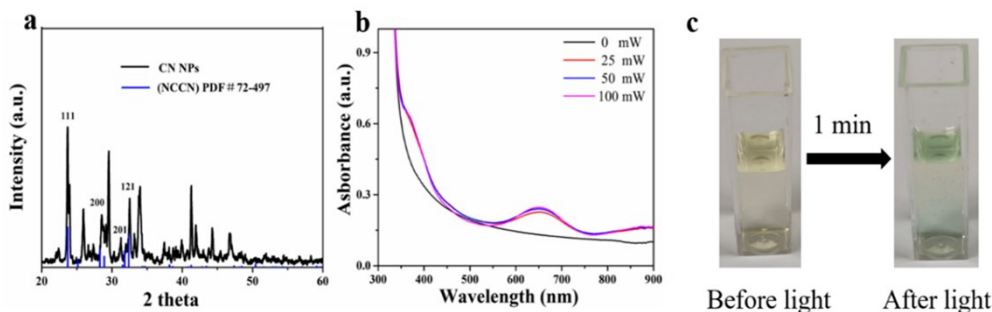

**Fig. S1.** (a) XRD patterns of CN NPs. (b) Absorption of 100  $\mu\text{L}$  TMB ( $1 \text{ mg mL}^{-1}$ ) aqueous solution of CN NPs at 652 nm under different power illumination. (c) The color changes of CN NP<sub>5</sub> ( $50 \text{ mg mL}^{-1}$ ) with TMB in aqueous solutions exposed to  $50 \text{ mW cm}^{-2}$  of light.

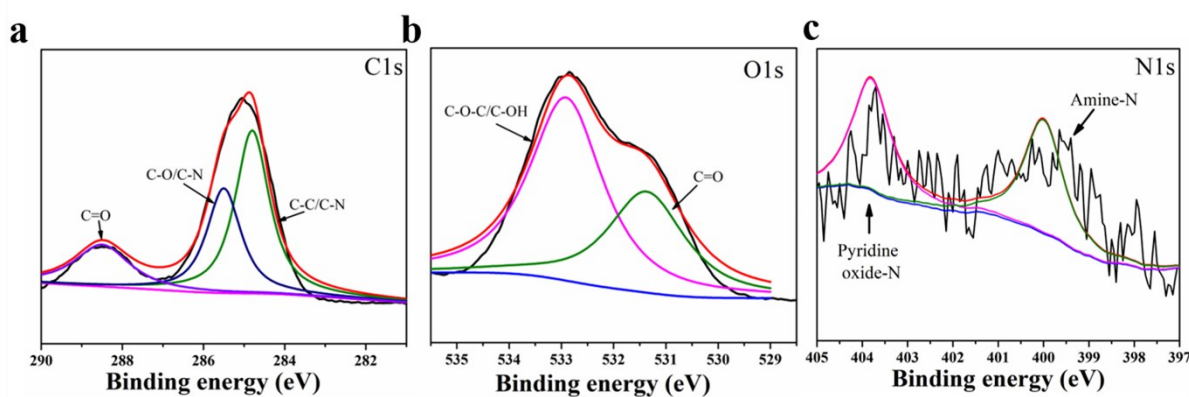

**Fig. S2.** (a) High resolution of C1s spectra of CN NPs. (b) High resolution of O1s XPS images of CN NPs. (c) High resolution of N1s spectra of CN NPs.

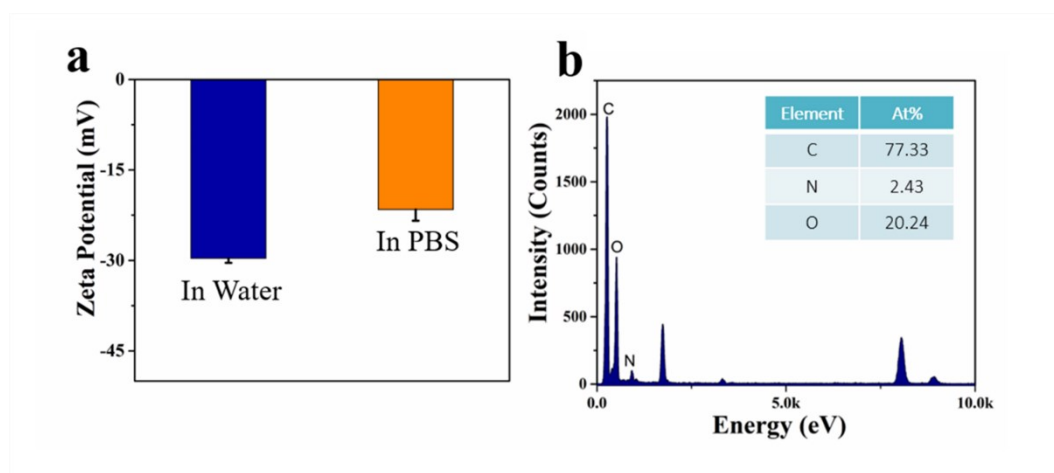

Fig. S3. (a) Zeta potential of CN NPs ( $200 \mu\text{g mL}^{-1}$ ) in water and PBS. (b) The EDS spectrum of the CN NPs.

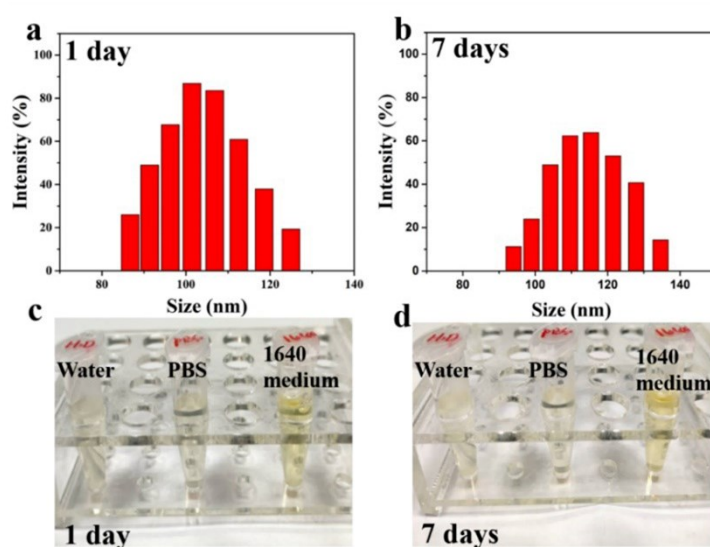

Fig. S4. (a-b) The particle of CN NPs aqueous solution placed for different days. (c-d) Stability of aqueous solution of CN NPs.

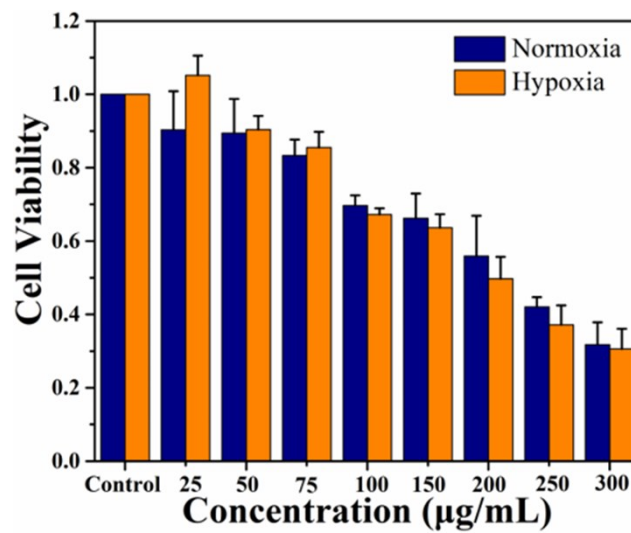

**Fig. S5.** 4T1 cell viability of CN NPs at different concentrations under white light irradiation in the normoxia and hypoxia.

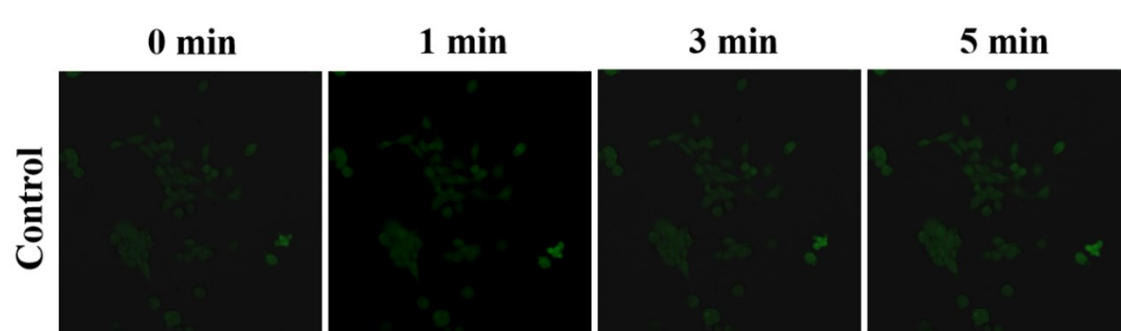

**Fig. S6.** Confocal fluorescence images of ROS generation in 4T1 cells without incubated with CN NPs.

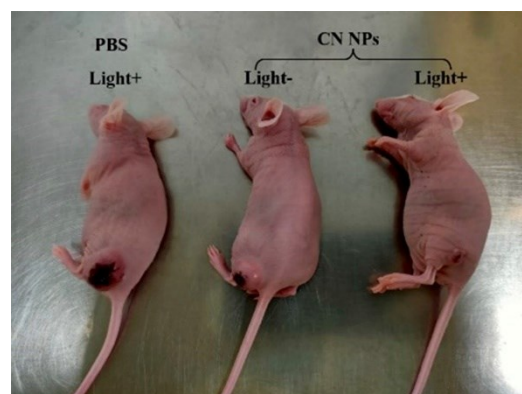

**Fig. S7.** Tumor volume for different groups of mice.

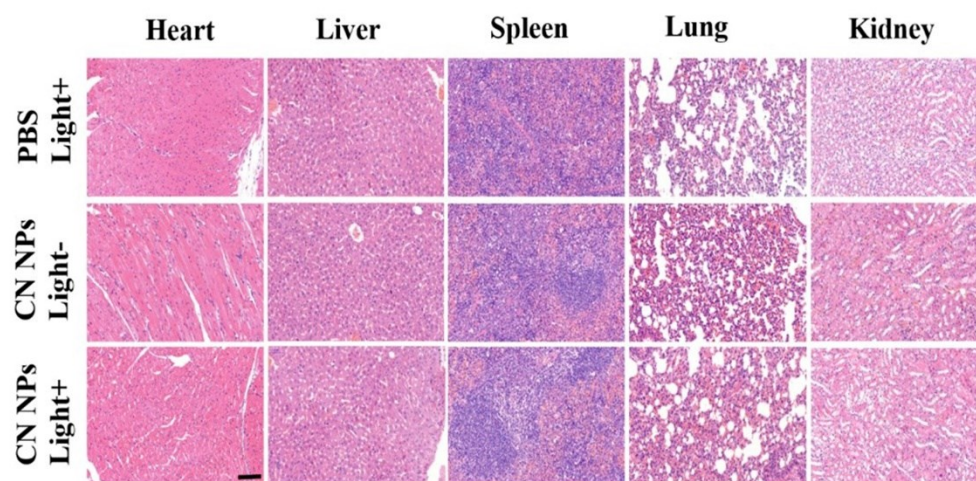

**Fig. S8.** H&E picture of the normal organs (heart, kidneys, liver, lung and spleen) in the control, no illumination and illumination groups. ( Scale bar, 50  $\mu$ m).
